# Supplementary material for: Role of the luxS gene in bacteriocin biosynthesis by Lactobacillus plantarum KLDS1.0391: A proteomic analysis
Source: PubMed Central journal article supplement (PMC5654829; doi:10.1038/s41598-017-13231-4), 2017-10-24

**Role of the *luxS* gene in bacteriocin biosynthesis of *Lactobacillus plantarum* KLDS1.0391: A proteomic analysis**

Fang-Fang Jia <sup>1, 2</sup>, Xue-Hui Pang <sup>1, 2</sup>, De-Quan Zhu <sup>1, 2, 3</sup>, Zong-Tao Zhu <sup>1, 2</sup>, Si-Rui Sun <sup>1, 2</sup>,  
Xiang-Chen Meng <sup>1, 2, \*</sup>

<sup>1</sup> Key Laboratory of Dairy Science, Ministry of Education, Northeast Agricultural University,  
Harbin, 150030, China

<sup>2</sup> Synergetic Innovation Center of Food Safety and Nutrition, Northeast Agricultural University,  
Harbin 150030, China

<sup>3</sup> College of Life Sciences, Jiamusi University, Jiamusi, 154007, People's Republic of China

\*Corresponding author. Tel.: +86-451-55191813. Fax: +86-451-55190340.

*E-mail address:* [xchmeng@hotmail.com](mailto:xchmeng@hotmail.com) (X. C. Meng)

1. Detection of the double chamber effect in co-cultivation of *L. plantarum* KLDS1.0391 and *L. helveticus* KLDS1.9207

The membrane permeability was detected by the method described below. The results are shown in Table S1.

| Detection of membrane permeability using double chamber                                                                                                                   |                                                             |                                                             |                                                              |                                                              |
|---------------------------------------------------------------------------------------------------------------------------------------------------------------------------|-------------------------------------------------------------|-------------------------------------------------------------|--------------------------------------------------------------|--------------------------------------------------------------|
|                                                                                                                                                                           | Group 1                                                     | Group 2                                                     | Group 3                                                      | Group 4                                                      |
| Upper chamber                                                                                                                                                             | <i>L. plantarum</i><br>KLDS1.0391                           | -                                                           | <i>L. helveticus</i><br>KLDS1.9207                           | -                                                            |
| Lower chamber                                                                                                                                                             | -                                                           | <i>L. plantarum</i><br>KLDS1.0391                           | -                                                            | <i>L. helveticus</i><br>KLDS1.9207                           |
| Each sample was incubated in MRS broth at 37 °C for 24 h with gentle agitation (60 rpm), and the culture was removed every 2 h for detecting the cell number of bacteria. |                                                             |                                                             |                                                              |                                                              |
| Upper chamber                                                                                                                                                             | *                                                           | Determine the cell number of <i>L. plantarum</i> KLDS1.0391 | *                                                            | Determine the cell number of <i>L. helveticus</i> KLDS1.9207 |
| Lower chamber                                                                                                                                                             | Determine the cell number of <i>L. plantarum</i> KLDS1.0391 | *                                                           | Determine the cell number of <i>L. helveticus</i> KLDS1.9207 | *                                                            |

“-” means that no strains are inoculated.

“\*” means that the number of cell in this chamber is not determined.

The bacterial growth was detected by the following method. *L. plantarum* KLDS1.0391 was inoculated (1%) into the double chamber and triangular flask. Sample was incubated in MRS broth at 37 °C for 24 h with gentle agitation (60 rpm). The culture was removed every 2 h, and the number of viable cell of *L. plantarum* KLDS1.0391 with time changes in two culture modes was detected. The results are shown in Fig. S3.

2. SDS-PAGE was carried out on vertical electrophoresis apparatus (SE260, GE-Healthcare) at 15 mA and per gel using a 12% (w/w) poly-acrylamide separating gel overlaid with a 5% stacking gel. Samples were boiled for 5 min in SDS-PAGE 5×(5:1, v/v) Sample Loading Buffer (10% SDS, 0.5% BPB, 50% Glycerol, 500 mM DTT, 250 mM Tris-HCl, pH 6.8), and centrifuged at 14000 g for 10 min. The supernatant was transferred to a new tube. Each lane on the gel received 20 µg of protein for electrophoresis at 5 mA for 60 min. After electrophoresis, the

polypeptides were stained with Coomassie Brilliant Blue R250 and decolorized with methanol/acetic acid. Finally, the result of electrophoresis was analyzed by gel imaging system.

Filter-aided-sample-preparation procedure was described as followed. Briefly, each sample added DTT to a final concentration of 100 mM, boiled for 5min and cooled down to room temperature. Then, 200  $\mu$ L UA buffer (8 M Urea, 150 mM Tris-HCl, pH 8.0) was added to remove the detergent, DTT and other low-molecular-weight components by repeated ultrafiltration (Microcon units, 30 kD) facilitated by centrifugation (14000 g, 15 min). Further, 100  $\mu$ L 50 mM iodoacetamide (IAA, Bio-Rad) in UA buffer was added to prevent the reduced cysteine residues and stirred at 600 rpm for 1 min, and the samples were incubated for 30 min in total darkness and centrifuged at 14000 g for 10 min. The filter was washed twice with 100  $\mu$ L UA buffer and 100  $\mu$ L 25 mM  $\text{NH}_4\text{HCO}_3$  buffer, respectively. Finally, the protein suspension was digested with 2  $\mu$ g Trypsin (Promega) in 40  $\mu$ L 25 mM  $\text{NH}_4\text{HCO}_3$  buffer at 37  $^\circ\text{C}$  for 16-18 h, and the resulting peptides were collected as a filtrate. The peptides of each sample were first desalted with C18-SD Extraction Disk Cartridge and then estimated by UV light absorbance at 280 nm.

3. The detailed liquid chromatographic conditions and elution gradient were described below. A binary mobile phase, which was consisted of eluent A (0.1% formic acid-2% acetonitrile, v/v) and eluent B (0.1% formic acid-84% acetonitrile, v/v) with a gradient program of 0-45% B (0-100 min), 45-100% B (100-108 min) and 100% B (108-120 min), was used throughout the separation. During the sample injections, the capillary HPLC column (Thermo EASY column SC200 150  $\mu\text{m}$ \*100 mm, RP-C18) was re-equilibrated with 100% A. The peptide mixtures (2  $\mu$ g) were loaded onto a RP-C18 column (SC001 traps 150  $\mu\text{m}$ \*20 mm) and the peptide separation was carried out in a RP-C18 column (SC200 150  $\mu\text{m}$ \*100 mm) at 400 nL/min as the gradient above.

The detailed Q-Exactive MS requirements were described below. The result of MS were acquired higher-energy collisional dissociation (HCD) fragmentation by choosing the positive ion and precursor ions range from 300 m/z to 1800 m/z. The resolution for survey MS scans was set at a value of 70,000 with a 200 m/z, and the HCD spectra were acquired a resolution of 17,500 with m/z of 200. The m/z of peptides and peptide fragments were collected by full scan and selected the twenty data-dependent MS/MS scans. The Normalized Collision Energy of 30 eV was used to activate precursor ions, and the Underfill ratio, which indicates the Mix percentage of the target value likely to be attained to the Max fill time, was defined as 0.1%.

Table S1 Detection effect of membrane permeability on *L. plantarum* KLDS1.0391 and *L. helveticus* KLDS1.9207

| Time (h) | Group 1                        | Group 2                        | Group 3                         | Group 4                         |
|----------|--------------------------------|--------------------------------|---------------------------------|---------------------------------|
|          | <i>L. plantarum</i> KLDS1.0391 | <i>L. plantarum</i> KLDS1.0391 | <i>L. helveticus</i> KLDS1.9207 | <i>L. helveticus</i> KLDS1.9207 |
| 0        | -                              | -                              | -                               | -                               |
| 2        | -                              | -                              | -                               | -                               |
| 4        | -                              | -                              | -                               | -                               |
| 6        | -                              | -                              | -                               | -                               |
| 8        | -                              | -                              | -                               | -                               |
| 10       | -                              | -                              | -                               | -                               |
| 12       | -                              | -                              | -                               | -                               |
| 14       | -                              | -                              | -                               | -                               |
| 16       | +                              | -                              | -                               | -                               |
| 18       | +                              | -                              | -                               | -                               |
| 20       | +                              | +                              | -                               | -                               |
| 22       | +                              | +                              | -                               | -                               |
| 24       | +                              | +                              | -                               | -                               |

“-” means that no cells were detected, “+” means that cells were detected.

Group 1- *L. plantarum* KLDS1.0391 is inoculated into the upper chamber.

Group 2- *L. plantarum* KLDS1.0391 is inoculated into the lower chamber.

Group 3- *L. helveticus* KLDS1.9207 is inoculated into the upper chamber.

Group 4- *L. helveticus* KLDS1.9207 is inoculated into the lower chamber.

Table S2 Main parameters used for protein identification and quantitative analysis

| Item                             | Value                                  |
|----------------------------------|----------------------------------------|
| Enzyme                           | Trypsin                                |
| Max Missed Cleavages             | 2                                      |
| Main search                      | 6 ppm                                  |
| First search                     | 20 ppm                                 |
| MS/MS Tolerance                  | 20 ppm                                 |
| Fixed modifications              | Carbamidomethyl (C)                    |
| Variable modifications           | Oxidation (M), Acetyl (Protein N-term) |
| Database                         | Uniprot_Lactobaci_55542_20160803.fasta |
| Database pattern                 | reverse                                |
| Include contaminants             | Ture                                   |
| Peptide FDR                      | $\leq 0.01$                            |
| Protein FDR                      | $\leq 0.01$                            |
| Time window (match between runs) | 2 min                                  |
| Protein Quantification           | Use razor and unique peptides          |
| LFQ                              | Ture                                   |
| LFQ min. ratio count             | 1                                      |

## Supplementary Figure Captions

Fig. S1 The structural model of chamber.

Fig. S2 Growth curve of *L. plantarum* KLDS1.0391 under different culture conditions. Cell numbers are expressed as means  $\pm$  SD (n=3).

Fig. S3 Quorum sensing pathway. The red represents the differential proteins in mono-cultivation on the graphic pathway map.

Figure S1

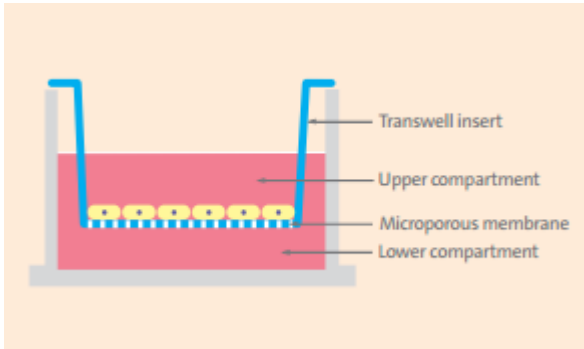



Figure S2

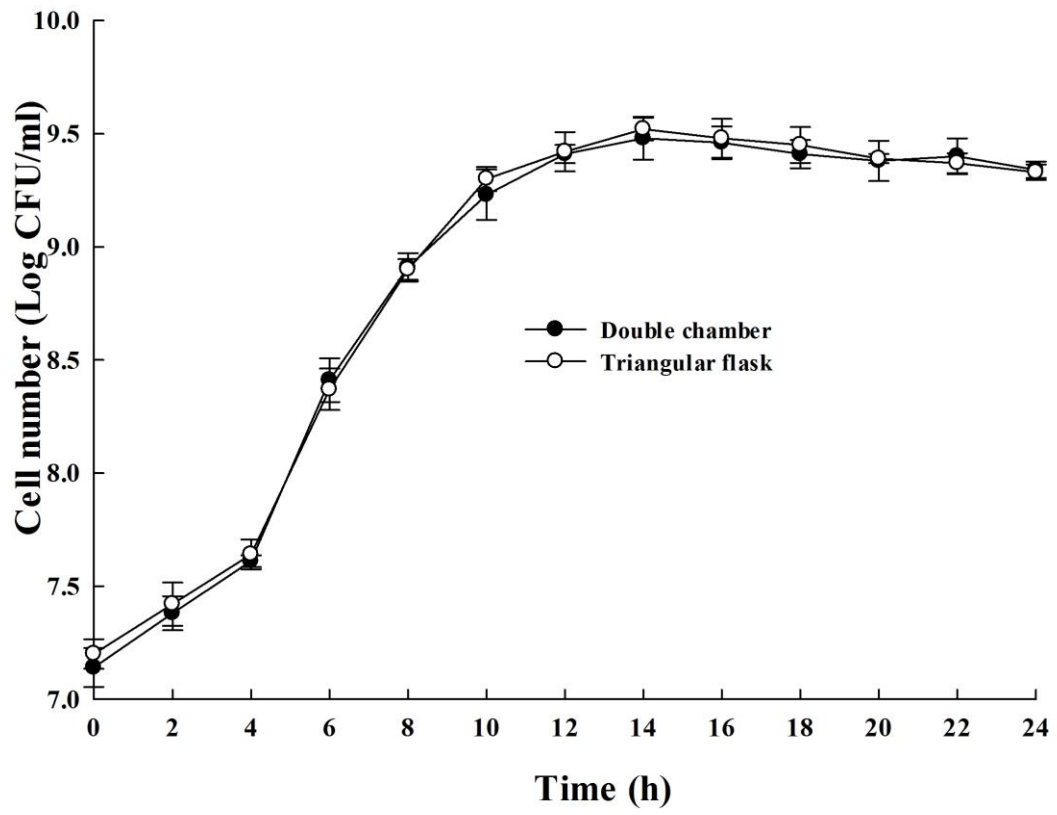

Figure S3

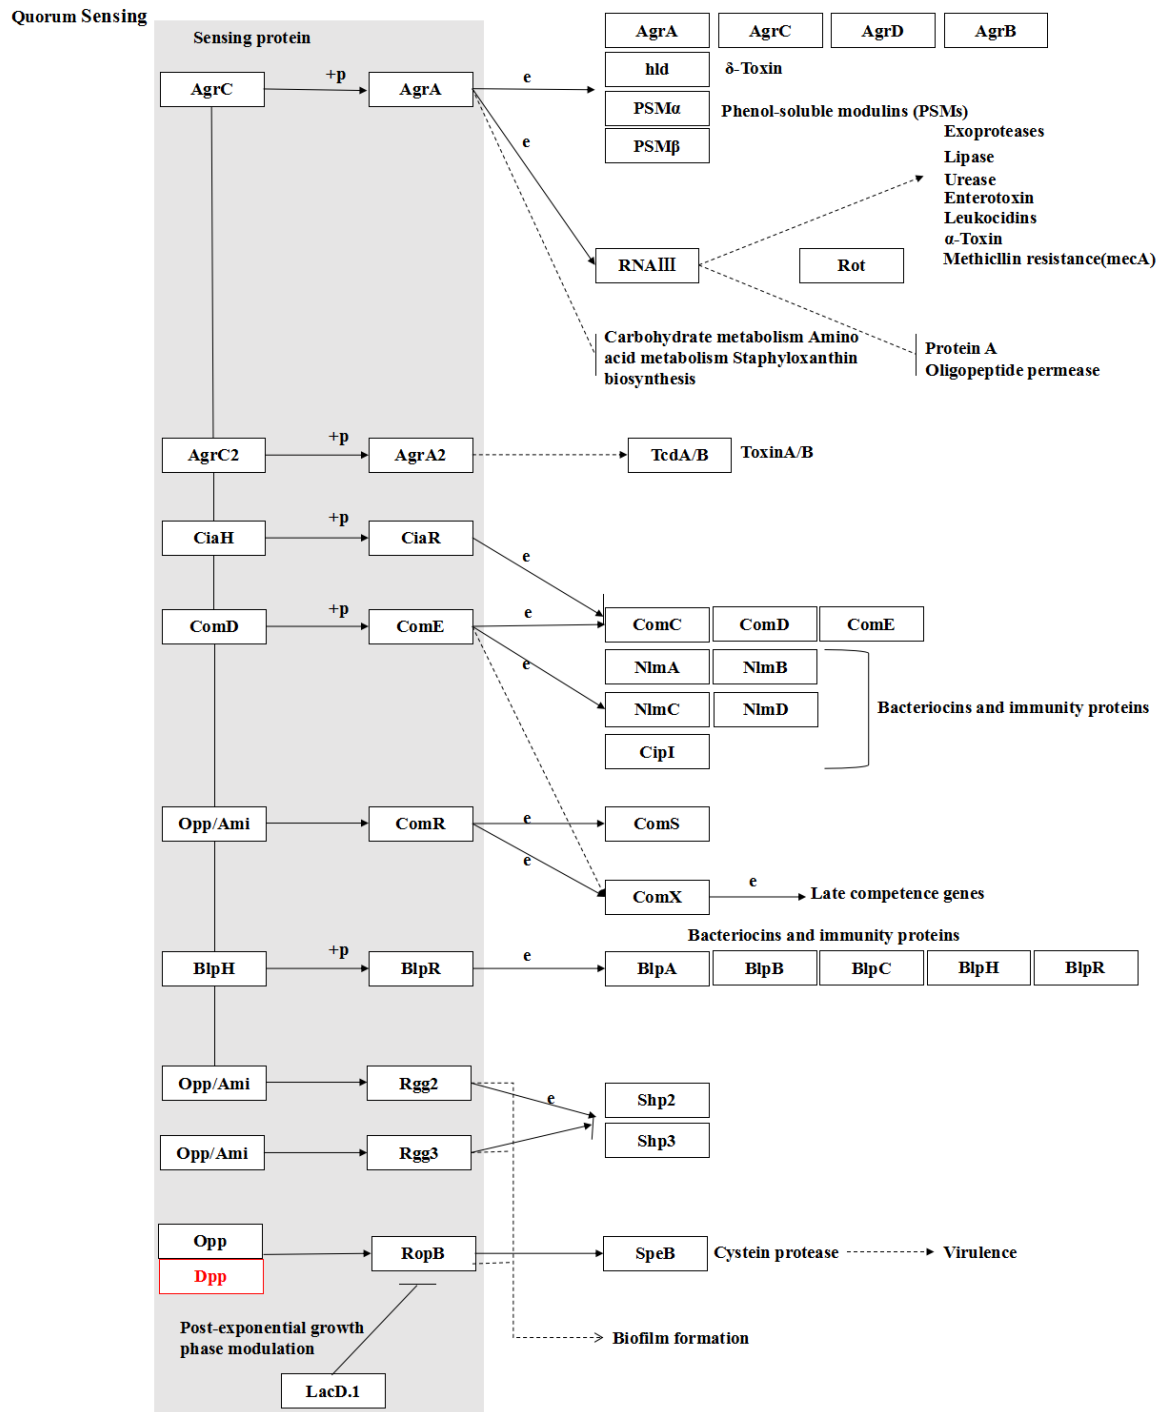

Supplement: 41598_2017_13231_MOESM1_ESM.pdf [file 41598_2017_13231_MOESM1_ESM.pdf]
